# Supplementary material for: The Exploitation of Local Vitis vinifera L. Biodiversity as a Valuable Tool to Cope with Climate Change Maintaining Berry Quality
Source: PubMed Central journal article supplement (PMC7824074; doi:10.3390/plants10010071), 2020-12-31
Supplement: plants-10-00071-s001.pdf [file plants-10-00071-s001.pdf]

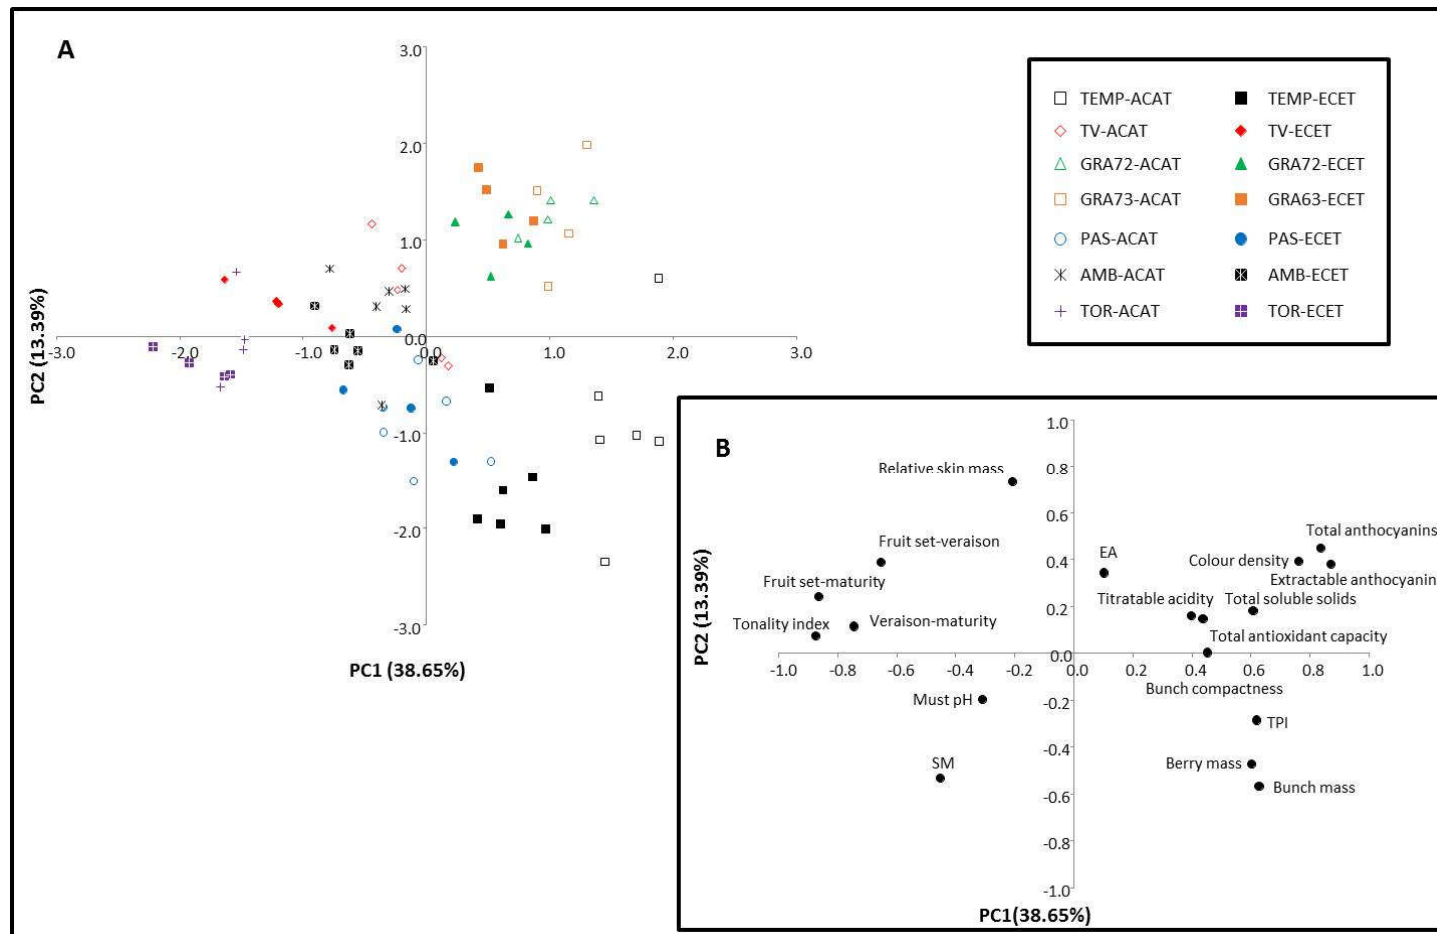

**Figure S1.** Principal component analysis score (A) and loading plot (B) obtained from the statistical analysis of plant and berry characteristics data of 68 studied samples from fruit-bearing cuttings of genotypes from seven local old grapevine varieties grown under two climate scenarios during berry ripening: 1) ambient CO<sub>2</sub> (ca. 400 μmol mol<sup>-1</sup>) and ambient temperature (T) (ACAT) and 2) elevated CO<sub>2</sub> (ca. 700 μmol mol<sup>-1</sup>) and elevated temperature (T+4°C) (ECET). The genotype labels can be found in Table 5.
